# Supplementary material
Source: publisher site journal article supplement (https://www.spandidos-publications.com/4878/downloadSupplementary)

Figure S1. Cell differentiation assessment of A-6 cells to ensure the validity of the evaluation. High-dose cytokines for each of the differentiation media were added as positive controls during the differentiation induction, followed by the analysis of the expression of marker genes, *Cd3e*, *Ptprc*, and *Id3*, characteristic of T cells, B cells, and NK cells, respectively. Data are presented as the mean  $\pm$  SE (n=3). \*P<0.05 compared with the control. NK, natural killer.

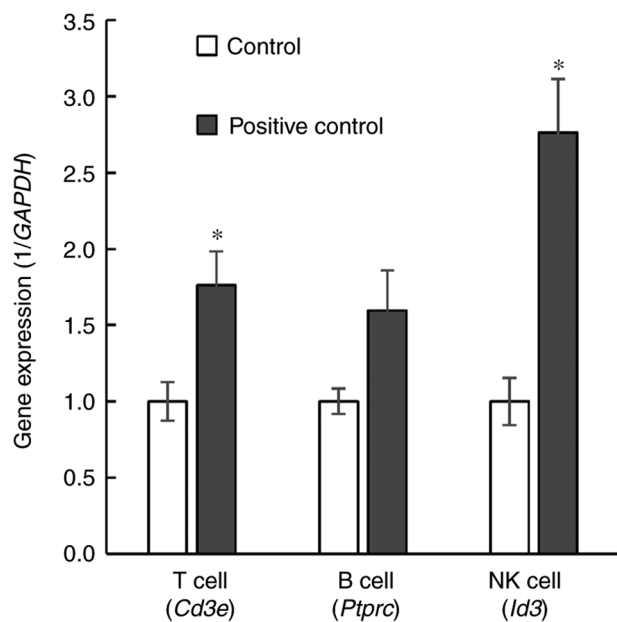

Supplement: Supplementary file 1 [file downloadSupplementary]
